# Supplementary material
Source: publisher site journal article supplement (https://www.dovepress.com/article/supplementary_file/568174/568174_Supplementary%20Material.docx)
Supplement: Supplementary file 1 [file 568174_Supplementary%20Material.docx]

**Supplementary Table 1 Collinearity Test**

| Term | All-cause mortality | | Cardiovascular mortality | |
| --- | --- | --- | --- | --- |
| VIF | collinearity | VIF | collinearity |
| Crude | 1.037 | No | 1.036 | No |
| Age | 1.220 | No | 1.218 | No |
| Marital status | 1.067 | No | 1.065 | No |
| Race/ethnicity | 1.061 | No | 1.058 | No |
| Education level | 1.123 | No | 1.116 | No |
| Family income | 1.075 | No | 1.071 | No |
| BMI | 1.074 | No | 1.085 | No |
| Alcohol use | 1.044 | No | 1.041 | No |
| Smoking status | 1.071 | No | 1.062 | No |
| Contraceptive use | 1.119 | No | 1.103 | No |
| The number of pregnancies | 1.024 | No | 1.024 | No |
| Female hormones use | 1.073 | No | 1.070 | No |
| NHANES cycles | 1.041 | No | 1.047 | No |

**Supplementary Table 2 Subgroup analyses of the association between reproductive lifespan and all-cause and cardiovascular mortality.**

| Variable | All-cause mortality | |  | Cardiovascular mortality | |
| --- | --- | --- | --- | --- | --- |
| HR(95%CI) | *p* for interaction |  | HR(95%CI) | *p for interaction* |
| Age at menarche |  | 0.173 |  |  | 0.636 |
| Age at menarche<13 | 1.23(1.01, 1.50) |  |  | 1.34(0.93, 1.92) |  |
| Age at menarche≥13 | 1.07(0.95, 1.21) |  |  | 1.31(1.04, 1.65) |  |
| Age at menopause |  | 0.244 |  |  | 0.398 |
| Age at menopause<48 | 1.29(0.80, 2.09) |  |  | 1.65(0.73, 3.76) |  |
| Age at menopause≥48 | 0.95(0.71, 1.26) |  |  | 1.05(0.63, 1.77) |  |
| Contraceptives use |  | 0.133 |  |  | 0.931 |
| No | 1.18(1.05, 1.34) |  |  | 1.33(1.06, 1.68) |  |
| Yes | 0.97(0.78, 1.20) |  |  | 1.39(0.93, 2.07) |  |
| Female hormones use |  | 0.672 |  |  | 0.933 |
| No | 1.14(1.00, 1.30) |  |  | 1.32(1.04, 1.67) |  |
| Yes | 1.19(1.02, 1.38) |  |  | 1.32(0.98, 1.77) |  |
| BMI |  | 0.958 |  |  | 0.214 |
| BMI<25 | 1.16(0.95, 1.40) |  |  | 1.08(0.78, 1.50) |  |
| BMI≥25 | 1.12(0.99, 1.27) |  |  | 1.41(1.13, 1.76) |  |
| Marital status |  | 0.509 |  |  | 0.084 |
| Married/living with a partner | 1.17(0.93, 1.46) |  |  | 1.55(1.04, 2.31) |  |
| Living alone | 1.10(0.98, 1.24) |  |  | 1.16(0.95, 1.42) |  |
| Race/ethnicity |  | 0.214 |  |  | 0.266 |
| Mexican American | 1.76(1.21, 2.57) |  |  | 1.48(0.66, 3.32) |  |
| Other Hispanic | 2.04(0.92, 4.52) |  |  | 3.91(1.41, 10.83) |  |
| Non-Hispanic white | 1.10(0.99, 1.23) |  |  | 1.26(1.03, 1.54) |  |
| Non-Hispanic black | 1.08(0.80, 1.45) |  |  | 1.56(0.95, 2.57) |  |
| Others race | 0.92(0.47, 1.80) |  |  | 1.45(0.47, 4.49) |  |
| Education level |  | 0.629 |  |  | 0.291 |
| less than high school | 1.16(0.90, 1.51) |  |  | 1.60(0.98, 2.60) |  |
| high school or equivalent | 1.08(0.92, 1.28) |  |  | 1.20(0.90, 1.59) |  |
| above high school | 1.18(0.99, 1.40) |  |  | 1.53(1.12, 2.08) |  |
| Family income, n (%) |  | 0.700 |  |  | 0.881 |
| Low | 1.20(1.01, 1.43) |  |  | 1.41(1.03, 1.94) |  |
| Medium | 1.08(0.93, 1.25) |  |  | 1.23(0.93, 1.62) |  |
| High | 1.13(0.90, 1.42) |  |  | 1.34(0.79, 2.28) |  |

Adjusted for age, marital status, race/ethnicity, education level, family income, smoking status, alcohol use, BMI, contraceptive use, number of pregnancies, female hormone use, and NHANES cycles, excluding the stratifying variable when it was also used as the grouping factor.

**Supplementary Table 3 Restricted mean survival time by reproductive lifespan category.**

| Follow time (month) | 60 | 120 | 240 |
| --- | --- | --- | --- |
| Reproductive lifespan<35 | 55.80 (55.29, 56.32) | 100.60 (99.15, 102.06) | 152.85 (149.09, 156.61) |
| Reproductive lifespan≥35 | 56.49 (56.05, 56.93) | 102.37 (101.06, 103.69) | 158.373 (154.71, 162.04) |
| RMST | 0.68 (0.01, 1.36) | 1.77(-0.19, 3.73) | 5.523(0.27, 10.77) |
| *p* | **0.048*** | 0.077 | **0.039*** |

Note: *p* values are set in bold and marked with an asterisk (*) to denote statistical significance at the 0.05 level.

The analysis was unweighted and not adjusted for any covariates.

**Supplementary Table 4 Association between tertiles of reproductive lifespan and all-cause and cardiovascular mortality risk**

| Variable | | Total No. | Event (%) | Model 1 | | Model 2 | |
| --- | --- | --- | --- | --- | --- | --- | --- |
| HR(95%CI) | *p* value | HR(95%CI) | *p* value |
| **All-cause mortality** | |  |  |  |  |  |  |
|  | Reproductive lifespan(tertiles) | |  |  |  |  |  |
|  | <32 | 1,495 | 686(45.99) | Reference |  | Reference |  |
|  | 32-37 | 1,416 | 557(37.33) | 0.86(0.75, 0.99) | **0.034*** | 0.87(0.77, 0.98) | **0.027*** |
|  | >37 | 1,603 | 600(33.71) | 0.87(0.78, 0.98) | **0.019*** | 0.84(0.75, 0.95) | **0.006*** |
|  | *p* for trend |  |  |  | **0.017*** |  | **0.006*** |
| **Cardiovascular mortality** | | |  |  |  |  |  |
|  | Reproductive lifespan(tertiles) | |  |  |  |  |  |
|  | <32 | 1495 | 195(13.83) | Reference |  | Reference |  |
|  | 32-37 | 1416 | 157(9.60) | 0.74(0.58, 0.94) | **0.014*** | 0.74(0.60, 0.92) | **0.007*** |
|  | >37 | 1603 | 160(9.10) | 0.78(0.63, 0.97) | **0.025*** | 0.76(0.60, 0.96) | **0.021*** |
|  | *p* for trend |  |  |  | **0.024*** |  | **0.020*** |

Note: *p* values are set in bold and marked with an asterisk (*) to denote statistical significance at the 0.05 level.

Model 1 was without covariate adjustment.

Model 2 was adjusted for age, marital status, race/ethnicity, education level, and family income, smoking status, alcohol use, and BMI, contraceptives use, number of pregnancies, female hormone use, NHANES cycles, and surgical menopause

**Supplementary Table 5 Association between reproductive lifespan and all-cause and cardiovascular mortality risk (excluding participants with missing data left 3,600 participants)**

| Variable | | Total No. | Event (%) | Model 1 | | Model 2 | |
| --- | --- | --- | --- | --- | --- | --- | --- |
| HR(95%CI) | *p* value | HR(95%CI) | *p* value |
| **All-cause mortality** | |  |  |  |  |  |  |
|  | Reproductive lifespan | 3,600 | 1,461 (38.25%) | 0.99(0.98, 0.99) | **<0.001*** | 0.99(0.98, 0.99) | **<0.001*** |
|  | Reproductive lifespan (Dichotomy) | |  |  |  |  |  |
|  | <35 | 1,386 | 636 (46.49%) | 1.22(1.10, 1.36) | **<0.001*** | 1.12(1.00, 1.24) | **0.045*** |
|  | ≥35 | 2,214 | 825 (33.75%) | Reference |  | Reference |  |
| **Cardiovascular mortality** | | |  |  |  |  |  |
|  | Reproductive lifespan | 3,600 | 405 (10.51%) | 0.98(0.97, 0.99) | **0.009*** | 0.99(0.97, 1.00) | 0.052 |
|  | Reproductive lifespan (Dichotomy) | |  |  |  |  |  |
|  | <35 | 1,386 | 191 (14.37%) | 1.52(1.24, 1.87) | **<0.001*** | 1.33(1.08, 1.64) | **0.007*** |
|  | ≥35 | 2,214 | 214(8.40%) | Reference |  | Reference |  |

Note: *p* values are set in bold and marked with an asterisk (*) to denote statistical significance at the 0.05 level.

Model 1 was without covariate adjustment.

Model 2 was further adjusted for age, marital status, race/ethnicity, education level, and family income, smoking status, alcohol use, and BMI, contraceptives use, number of pregnancies, female hormone use and NHANES cycles.

**Supplementary Table 6 Association between reproductive lifespan and all-cause and cardiovascular mortality risk (additionally adjusted for surgical menopause)**

| Variable | | Total No. | Event (%) | Model 1 | | Model 2 | |
| --- | --- | --- | --- | --- | --- | --- | --- |
| HR(95%CI) | *p* value | HR(95%CI) | *p* value |
| **All-cause mortality** | |  |  |  |  |  |  |
|  | Reproductive lifespan | 4,514 | 1,843(38.67) | 0.99(0.99, 1.00) | **0.005*** | 0.99(0.98, 0.99) | **<0.001*** |
|  | Reproductive lifespan (Dichotomy) | |  |  |  |  |  |
|  | <35 | 2,088 | 927(44.21) | 1.15(1.04,1.26) | **0.005*** | 1.12(1.02, 1.24) | **0.022*** |
|  | ≥35 | 2,426 | 916(34.35) | Reference |  | Reference |  |
| **Cardiovascular mortality** | | |  |  |  |  |  |
|  | Reproductive lifespan | 4,514 | 512(10.74) | 0.99(0.97,1.00) | **0.017*** | 0.98(0.97, 1.00) | **0.016*** |
|  | Reproductive lifespan (Dichotomy) | |  |  |  |  |  |
|  | <35 | 2,088 | 272(13.28) | 1.35(1.14,1.61) | **<0.001*** | 1.29(1.07, 1.55) | **0.008*** |
|  | ≥35 | 2,426 | 240(8.75) | Reference |  | Reference |  |

Note: *p* values are set in bold and marked with an asterisk (*) to denote statistical significance at the 0.05 level.

Model 1 was without covariate adjustment.

Model 2 was adjusted for age, marital status, race/ethnicity, education level, and family income, smoking status, alcohol use, and BMI, contraceptives use, number of pregnancies, female hormone use, NHANES cycles, and surgical menopause

**Supplementary Table 7 Association between reproductive lifespan and all-cause and cardiovascular mortality risk (excluding surgical menopause left 3,607 participants)**

| Variable | | Total No. | Event (%) | Model 1 | | Model 2 | |
| --- | --- | --- | --- | --- | --- | --- | --- |
| HR(95%CI) | *p* value | HR(95%CI) | *p* value |
| **All-cause mortality** | |  |  |  |  |  |  |
|  | Reproductive lifespan | 3,607 | 1,465 (38.29) | 0.98(0.98, 0.99) | **<0.001*** | 0.99(0.98, 0.99) | **<0.001*** |
|  | Reproductive lifespan (Dichotomy) | |  |  |  |  |  |
|  | <35 | 1,389 | 638 (46.54) | 1.22(1.10, 1.36) | **<0.001*** | 1.12(1.01, 1.25) | **0.038*** |
|  | ≥35 | 2,218 | 827 (33.79) | Reference |  | Reference |  |
| **Cardiovascular mortality** | | |  |  |  |  |  |
|  | Reproductive lifespan | 3,607 | 406 (10.52) | 0.98(0.97,0.99) | **0.008*** | 0.99(0.97, 1.00) | 0.052 |
|  | Reproductive lifespan (Dichotomy) | |  |  |  |  |  |
|  | <35 | 1,389 | 191 (14.34) | 1.52(1.24, 1.87) | **<0.001*** | 1.33(1.07, 1.64) | **0.009*** |
|  | ≥35 | 2218 | 215 (8.43) | Reference |  | Reference |  |

Note: *p* values are set in bold and marked with an asterisk (*) to denote statistical significance at the 0.05 level.

Model 1 was without covariate adjustment.

Model 2 was adjusted for age, marital status, race/ethnicity, education level, and family income, smoking status, alcohol use, and BMI, contraceptives use, number of pregnancies, female hormone use, and NHANES cycles.

**Supplementary Table 8 Association between reproductive lifespan and all-cause and cardiovascular mortality risk (****excluding participants with age at menarche > 20, age at menopause > 60 or < 30 left 4,476 participants)**

| Variable | | Total No. | Event (%) | Model 1 | | Model 2 | |
| --- | --- | --- | --- | --- | --- | --- | --- |
| HR(95%CI) | *p* value | HR(95%CI) | *p* value |
| **All-cause mortality** | |  |  |  |  |  |  |
|  | Reproductive lifespan | 4,476 | 1,821 (38.53%) | 0.99(0.99, 1.00) | **0.007*** | 0.99(0.98, 0.99) | **<0.001*** |
|  | Reproductive lifespan (Dichotomy) | |  |  |  |  |  |
|  | <35 | 2,068 | 914 (44.01%) | 1.14(1.04, 1.26) | **0.008*** | 1.13(1.02, 1.25) | **0.016*** |
|  | ≥35 | 2,408 | 907 (34.27%) | Reference |  | Reference |  |
| **Cardiovascular mortality** | | |  |  |  |  |  |
|  | Reproductive lifespan | 4,476 | 505 (10.70%) | 0.98(0.97, 1.00) | **0.013*** | 0.98(0.97, 0.99) | **0.005*** |
|  | Reproductive lifespan (Dichotomy) | |  |  |  |  |  |
|  | <35 | 2,068 | 269 (13.28%) | 1.36(1.14, 1.62) | **<0.001*** | 1.34(1.11, 1.60) | **0.002*** |
|  | ≥35 | 2,408 | 236 (8.69%) | Reference |  | Reference |  |

Note: *p* values are set in bold and marked with an asterisk (*) to denote statistical significance at the 0.05 level.

Model 1 was without covariate adjustment.

Model 2 was further adjusted for age, marital status, race/ethnicity, education level, and family income, smoking status, alcohol use, and BMI, contraceptives use, number of pregnancies, female hormone use and NHANES cycles.

**
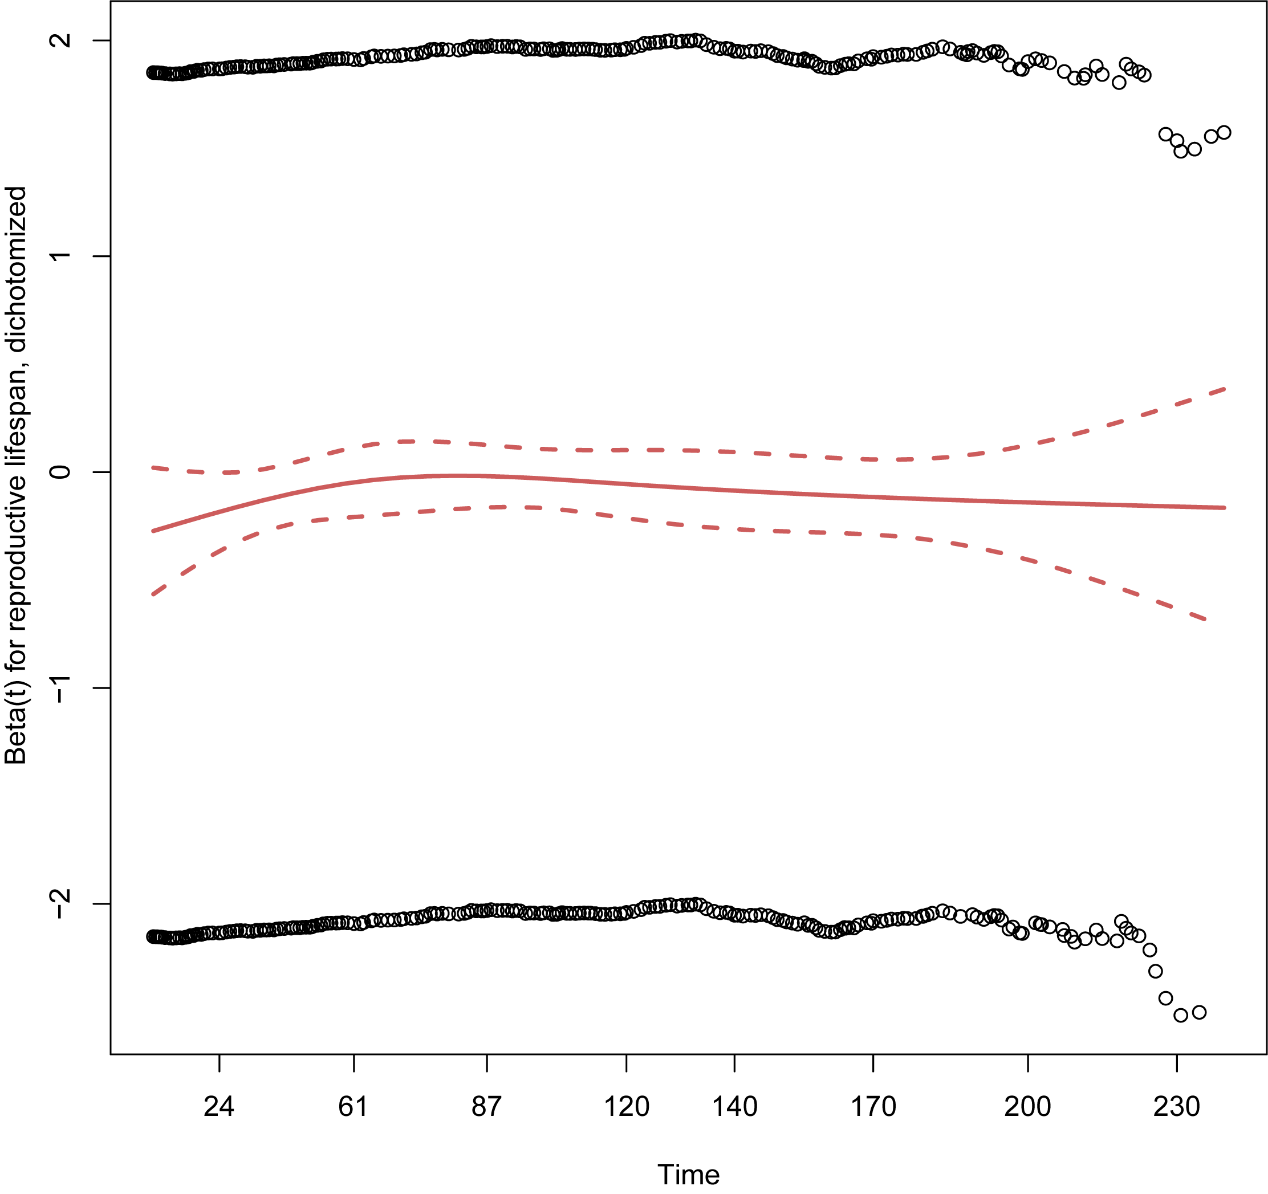
Supplementary Figure 1. Proportional-hazards assumption for reproductive lifespan and all-cause mortality**

**
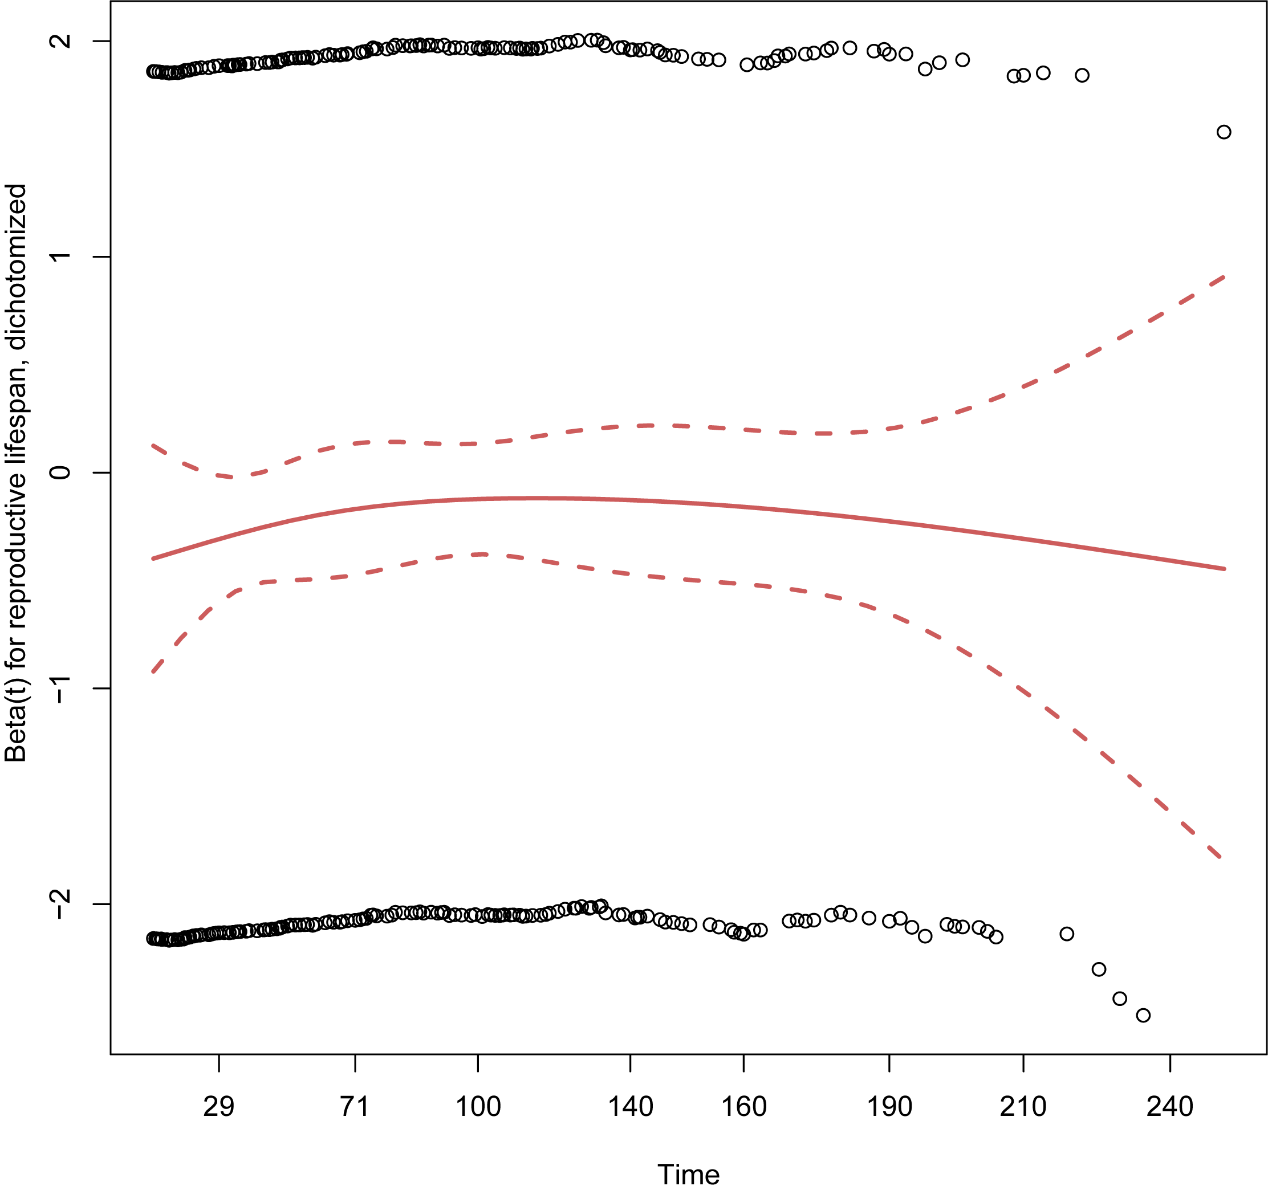
Supplementary Figure 2. Proportional-hazards assumption for reproductive lifespan and cardiovascular mortality**
